# Supplementary material for: Construction of the Infection Curve of Local Cases of COVID-19 in Hong Kong using Back-Projection
Source: MDPI journal article supplement (doi:10.3390/ijerph17186909), 2020-09-21

**Table S1.** Announcements and implementations of selected policies and major events in Hong Kong.

| <b>Major government policies/events</b>                                                                                                                                                                                                                                                                                  | <b>Dates of Announcement</b> | <b>Dates of Implementation</b> |
|--------------------------------------------------------------------------------------------------------------------------------------------------------------------------------------------------------------------------------------------------------------------------------------------------------------------------|------------------------------|--------------------------------|
| Preparedness and Response Plan launched                                                                                                                                                                                                                                                                                  | January 4                    | January 4                      |
| Health advice on personal and environmental hygiene and outbound travel                                                                                                                                                                                                                                                  | January 5                    | January 5                      |
| Mandatory notification of cases                                                                                                                                                                                                                                                                                          | January 7                    | January 8                      |
| Red Outbound Travel Alert issued on Iran                                                                                                                                                                                                                                                                                 | January 10                   | January 10                     |
| Port health measures and temperature screening of inbound travelers strengthened with increased frequency of random checking at all boundary control points; patients with fever and acute respiratory symptoms who had visited Wuhan within the preceding 14 days would be immediately referred to the public hospitals | January 11                   | January 11                     |
| Reporting criteria revised; additional temperature checks using handheld infrared thermometers on all inbound travelers via the two daily high-speed trains with stops at Wuhan; travelers who fulfilled the reporting criteria would immediately be referred to the public hospitals                                    | January 16                   | January 16                     |
| Further revision of reporting criteria                                                                                                                                                                                                                                                                                   | January 20                   | January 20                     |
| Submission of a health declaration form for all inbound travelers by air from Wuhan                                                                                                                                                                                                                                      | January 20                   | January 21                     |
| Further revision of reporting criteria                                                                                                                                                                                                                                                                                   | January 23                   | January 23                     |
| Submission of a health declaration form for all inbound travelers via the high-speed train                                                                                                                                                                                                                               | January 23                   | January 24                     |
| First quarantine center ready for use                                                                                                                                                                                                                                                                                    | January 23                   | January 23                     |
| Activation of Emergency Response Level; strengthening immigration control; cancellation of large-scale events; suspension of schools                                                                                                                                                                                     | January 25                   | January 25                     |
| <b>Infection cluster:</b> Thirteen people visited a Buddhist worship hall in North Point between January 25 and early February and another 6 confirmed cases were epidemiologically linked to these cases                                                                                                                | --                           | January 25                     |
| <b>Infection cluster:</b> Twenty people attended a family dinner in North Point and 19 people attended a family gathering at a party room in Kwun Tong, and a total of 17 confirmed cases were subsequently reported                                                                                                     | --                           | January 26                     |
| Ban on non-resident inbound travelers who had visited the Hubei Province in the past 14 days                                                                                                                                                                                                                             | January 26                   | January 27, 0 am               |
| Additional health advice for inbound travelers who had visited the Hubei Province or other places in Mainland China in the past 14 days                                                                                                                                                                                  | January 28                   | January 28                     |
| Submission of a health declaration form by all inbound travelers from Mainland China was expanded from those who traveled via the high-speed train to those who traveled by flight                                                                                                                                       | January 28                   | January 29, 9 am               |

|                                                                                                                                                                                                                                                                                                                                                                          |             |                   |
|--------------------------------------------------------------------------------------------------------------------------------------------------------------------------------------------------------------------------------------------------------------------------------------------------------------------------------------------------------------------------|-------------|-------------------|
| Suspension of non-emergent government services; closure of public facilities (all sports facilities, holiday camps, museums, performance venues, and public libraries including study rooms); home office arrangement for civil servants; appeal to employers to make flexible work arrangements                                                                         | January 28  | January 29        |
| Substantial reduction of traffic between Mainland China and Hong Kong; suspension of four control points; suspension of passenger services at two control points                                                                                                                                                                                                         | January 28  | January 30, 0 am  |
| Suspension of four more control points                                                                                                                                                                                                                                                                                                                                   | February 3  | February 4        |
| Mandatory home quarantine on all inbound travelers from Mainland China and on those who had visited Mainland China in the past 14 days                                                                                                                                                                                                                                   | February 5  | February 8        |
| "Enhanced Laboratory Surveillance Programme" to include people aged 18 or above with fever and respiratory symptoms or mild chest infection attending the General Out-patient Clinics and Accident and Emergency Departments of the Hospital Authority                                                                                                                   | February 18 | February 19       |
| First batch of persons completed compulsory quarantine                                                                                                                                                                                                                                                                                                                   | February 22 | February 22       |
| Red Outbound Travel Alert issued on Korea                                                                                                                                                                                                                                                                                                                                | February 24 | February 24       |
| Ban on inbound non-resident travelers from Korea; mandatory quarantine at the quarantine center on inbound resident travelers who had visited Daegu and Gyeongsangbuk-do in Korea in the past 14 days; medical surveillance on inbound resident travelers who had visited other places in Korea in the past 14 days                                                      | February 24 | February 25, 6 am |
| Red Outbound Travel Alert issued on Emilia-Romagna, Lombardy, and the Veneto regions in Italy which cover Bologna, Milan, Venice, and Verona                                                                                                                                                                                                                             | February 28 | February 28       |
| "Enhanced Laboratory Surveillance Programme" to include people aged below 18 and patients with fever or respiratory symptoms subject to clinical assessment of the physician in charge, and those with fever and respiratory symptoms or mild chest infection attending the General Out-patient Clinics and Accident and Emergency Departments of the Hospital Authority | --          | February 28       |
| Mandatory quarantine at quarantine centers on all inbound travelers (regardless of whether they were Hong Kong residents) who had visited Emilia-Romagna, Lombardy, or Veneto regions in Italy or Iran in the past 14 days                                                                                                                                               | February 28 | March 1, 0 am     |
| Some non-emergent government services and public facilities gradually resumed; back to work at office for civil servants also gradually resumed                                                                                                                                                                                                                          | --          | March 2-22        |
| "Enhanced Laboratory Surveillance Programme" to cover around 10 types of viruses                                                                                                                                                                                                                                                                                         | March 3     | March 4           |
| Submission of health declaration form for all inbound flight passengers                                                                                                                                                                                                                                                                                                  | March 6     | March 8, 0 am     |
| Red Outbound Travel Alert issued on the whole of Italy, France (Bourgogne-Franche-Comte and Grand Est), Germany (North Rhine-Westphalia), Japan (Hokkaido), and Spain (La Rioja, Madrid, and Pais Vasco)                                                                                                                                                                 | March 10    | March 10          |
| Mandatory quarantine at quarantine centers on all inbound travelers (regardless of whether they were Hong Kong residents) who had visited Italy, France (Bourgogne-Franche-Comte and Grand Est), Germany (North Rhine-                                                                                                                                                   | March 10    | March 14, 0 am    |

|                                                                                                                                                                                                                                                                                                                                                                                                            |          |                    |
|------------------------------------------------------------------------------------------------------------------------------------------------------------------------------------------------------------------------------------------------------------------------------------------------------------------------------------------------------------------------------------------------------------|----------|--------------------|
| Westphalia), Japan (Hokkaido), and Spain (La Rioja, Madrid, and Pais Vasco) in the past 14 days                                                                                                                                                                                                                                                                                                            |          |                    |
| Red Outbound Travel Alert issued on the Schengen Area countries; a reminder of Red Outbound Travel Alert issued on Egypt                                                                                                                                                                                                                                                                                   | March 13 | March 13           |
| Mandatory quarantine at home on all inbound travelers (regardless of whether they were Hong Kong residents) who had visited the Schengen Area countries (except Emilia-Romagna, Lombardy, and Veneto regions in Italy) in the past 14 days                                                                                                                                                                 | March 13 | March 17, 0 am     |
| Mandatory quarantine at quarantine centers on inbound non-resident travelers who had visited Daegu and Gyeongsangbuk-do in Korea in the past 14 days; mandatory quarantine at home on inbound non-resident travelers who had visited other places in Korea in the past 14 days (ban on entry of non-residents from Korea relieved)                                                                         | March 13 | March 17, 0 am     |
| Mandatory quarantine at home on all inbound travelers (regardless of whether they were Hong Kong residents) who had visited Italy (except Emilia-Romagna, Lombardy, and Veneto regions), France (Bourgogne-Franche-Comte and Grand Est), Germany (North Rhine-Westphalia), Japan (Hokkaido), and Spain (La Rioja, Madrid, and Pais Vasco) in the past 14 days (requirement on quarantine centers relieved) | March 13 | March 14, 0 am     |
| <b>Infection cluster:</b> Over 80 people attended a cocktail wedding party in Discovery Bay and over 100 people attended a private party in Wong Chuk Hang, and a total of 14 confirmed cases were reported                                                                                                                                                                                                | --       | March 14           |
| Red Outbound Travel Alert issued on Ireland, the United Kingdom, and the United States                                                                                                                                                                                                                                                                                                                     | March 15 | March 15           |
| Mandatory home quarantine on all inbound travelers (regardless of whether they were Hong Kong residents) who had travelled to Ireland, the United Kingdom, the United States, and Egypt in the past 14 days                                                                                                                                                                                                | March 15 | March 19, 0 am     |
| <b>Infection cluster:</b> Seventy-two staff and customers of some pubs and bar areas were infected around mid-March, and 31 confirmed cases were epidemiologically linked to this cluster                                                                                                                                                                                                                  | --       | March              |
| Red Outbound Travel Alert issued on all overseas countries/territories                                                                                                                                                                                                                                                                                                                                     | March 17 | March 17           |
| Mandatory quarantine on all inbound travelers (regardless of whether they were Hong Kong residents) who had travelled to overseas countries or territories in the past 14 days                                                                                                                                                                                                                             | March 17 | March 19, 0 am     |
| "Enhanced Laboratory Surveillance Programme" to cover asymptomatic inbound travelers aged 65 or above and asymptomatic travelers residing with persons aged 65 or above                                                                                                                                                                                                                                    | March 19 | March 19 afternoon |
| Inbound travelers with symptoms of upper respiratory symptoms tested at the AsiaWorld-Expo and North Lantau Hospital test centers and had to wait for the results                                                                                                                                                                                                                                          | March 19 | March 20           |
| For the second time, suspension of non-emergent government services; closure of public facilities (all sports facilities, holiday camps, museums, performance                                                                                                                                                                                                                                              | March 22 | March 23           |

|                                                                                                                                                                                                                                                                                                                                                 |          |                |
|-------------------------------------------------------------------------------------------------------------------------------------------------------------------------------------------------------------------------------------------------------------------------------------------------------------------------------------------------|----------|----------------|
| venues, and public libraries including study rooms); home office arrangement for civil servants; appeal to employers to make flexible work arrangements                                                                                                                                                                                         |          |                |
| Ban on inbound non-resident travelers from overseas countries/regions by flight or via Mainland China, Macao, and Taiwan in the past 14 days; suspension of all transit services at the airport; mandatory quarantine on all inbound travelers (regardless of whether they were Hong Kong residents) from or who had stayed in Macao and Taiwan | March 23 | March 25, 0 am |
| Request to clubs on private recreational leases to close their recreational and sports facilities, changing rooms, and children's playrooms on their premises; appeal to other private clubs and facilities in residential complexes to adopt the same measure                                                                                  | March 23 | --             |
| "Enhanced Laboratory Surveillance Programme" to cover asymptomatic inbound travelers arriving from the United Kingdom, other countries in Europe, and the United States                                                                                                                                                                         | March 24 | March 25       |
| <b>Infection Cluster:</b> Seven people went to a karaoke bar and were infected                                                                                                                                                                                                                                                                  | --       | March 24       |
| Strict operation requirements on the catering business (seats < half of the normal capacity, ≥1.5 m between tables or with partitions, ≤4 people at one table, must wear masks unless consuming food or drink, body temperature screening at entrance, and provision of hand sanitizers)                                                        | March 27 | March 28, 6 pm |
| Closure of amusement game centers, bathhouses, fitness centers, places of amusement, places of public entertainment, and party rooms                                                                                                                                                                                                            | March 27 | March 28, 6 pm |
| Ban on group gatherings of more than four people in public places                                                                                                                                                                                                                                                                               | March 27 | March 29, 0 am |
| Closure of country park barbecue sites and campsites, and all outdoor sports or recreational facilities                                                                                                                                                                                                                                         | March 27 | March 28, 6 pm |
| Closure of karaoke, mahjong-tin kau, and nightclub establishments, and suspension of karaoke and mahjong-tin kau activities at any catering business                                                                                                                                                                                            | April 1  | April 1, 6 pm  |
| Closure of bars and pubs, including any part of a catering business premise or clubhouse that is exclusively or mainly used for the sale or supply of intoxicating liquors for consumption                                                                                                                                                      | April 2  | April 3, 6 pm  |
| Shortening of the operating hours of passenger clearance services at the Shenzhen Bay Port from 10 am to 8 pm                                                                                                                                                                                                                                   | April 2  | April 3        |
| Presentation of health certification code by all cross-boundary goods vehicle drivers entering Shenzhen and presentation of proof of a negative result of a nucleic acid test conducted within the previous seven days to the Shenzhen customs officers for examination before entering Hong Kong                                               | April 3  | April 10       |
| Shortening of the operating hours of passenger clearance services at the Hong Kong–Zhuhai–Macao Bridge in Hong Kong Port from 10 am to 8 pm, and for private cars from 6 am to 10 pm                                                                                                                                                            | April 4  | April 5        |
| Test centers at the AsiaWorld-Expo and North Lantau Hospital consolidated at the AsiaWorld-Expo                                                                                                                                                                                                                                                 | April 5  | April 5, 8 pm  |

|                                                                                                                                                                                                                                                                                                                                                                                                           |          |                |
|-----------------------------------------------------------------------------------------------------------------------------------------------------------------------------------------------------------------------------------------------------------------------------------------------------------------------------------------------------------------------------------------------------------|----------|----------------|
| Mandatory deep throat saliva samples taken from all asymptomatic inbound travelers arriving at the airport. Mandatory quarantine at own accommodation after sample collection                                                                                                                                                                                                                             | April 7  | April 8        |
| Mandatory deep throat saliva samples taken from all asymptomatic inbound travelers from the United Kingdom arriving at the airport. After sample collection, they had to wait for the results at the test center                                                                                                                                                                                          | April 7  | April 9        |
| “Enhanced Laboratory Surveillance Programme” extended to inbound travelers, who had visited the Hubei Province in the past 14 days, arriving through two control points. These travelers were required to collect their deep throat saliva samples by themselves while undergoing compulsory home quarantine, and to have their family members or friends deliver the same to the collection points       | April 7  | April 8        |
| Closure of beauty parlors and massage establishments                                                                                                                                                                                                                                                                                                                                                      | April 8  | April 10, 0 am |
| Confinees at the quarantine centers would stay there for 10 days and be evaluated on whether they could serve the remaining four-day quarantine period at home                                                                                                                                                                                                                                            | April 9  | April 11       |
| Mandatory deep throat saliva samples taken from all asymptomatic inbound travelers arriving on flights from the United States and other areas in Europe and had to wait for the results                                                                                                                                                                                                                   | April 11 | April 13       |
| The temporary COVID-19 test center at the AsiaWorld-Expo suspended from April 19 due to the declining number of inbound travelers                                                                                                                                                                                                                                                                         | April 18 | April 19       |
| Mandatory testing on all inbound travelers arriving at the airport and permission to return to the community only if the test result was negative. All asymptomatic inbound travelers arriving on flights in the afternoon or at night had to stay and wait for the virus test results at the holding center and continue quarantine at their place of accommodation only if the test result was negative | April 20 | April 22       |
| Temporary closure of beaches and suspension of life-saving services at the beaches                                                                                                                                                                                                                                                                                                                        | April 25 | April 25       |
| Public services resumed                                                                                                                                                                                                                                                                                                                                                                                   | April 29 | May 4          |

Note: The above are extracts from [www.info.gov.hk/gia/](http://www.info.gov.hk/gia/) and [www.news.gov.hk](http://www.news.gov.hk), please visit the sites for a full list.

**Figure S1.** Estimated daily number of infections of the coronavirus disease (COVID-19) in Hong Kong from 12 January to 30 April 2020, including and excluding the asymptomatic cases.

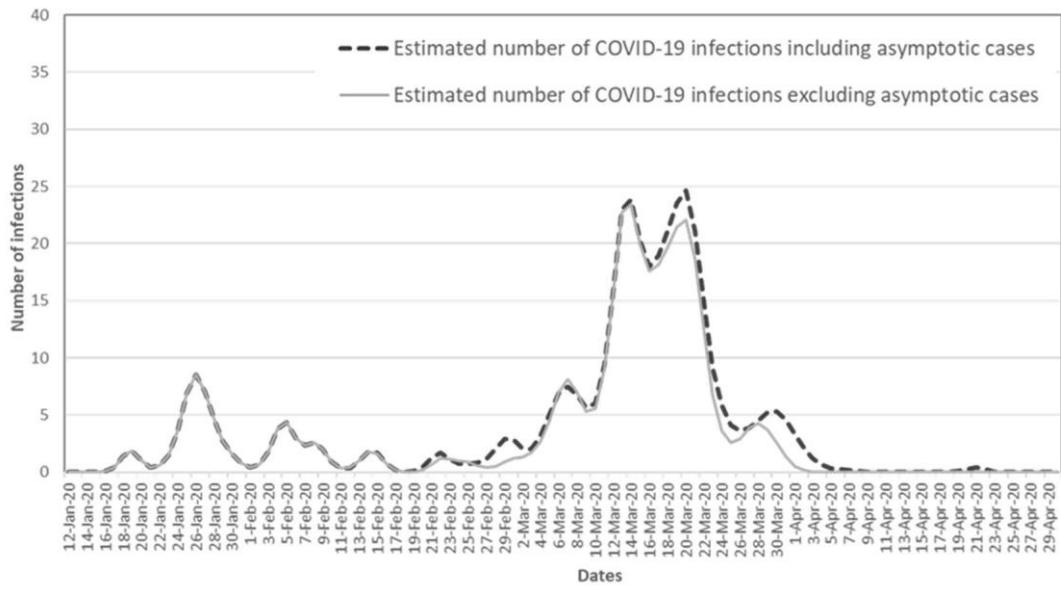

Supplement: s1 [file s1]
